# Supplementary material for: Feasibility of a peer-supported, WhatsApp-assisted, lifestyle modification intervention for weight reduction among adults in an urban slum of Karachi, Pakistan: a mixed-methods, single-group, pretest–post-test, quasi-experimental study
Source: HighWire-hosted journal article supplement (doi:10.1136/bmjopen-2022-070913), 2023-08-01

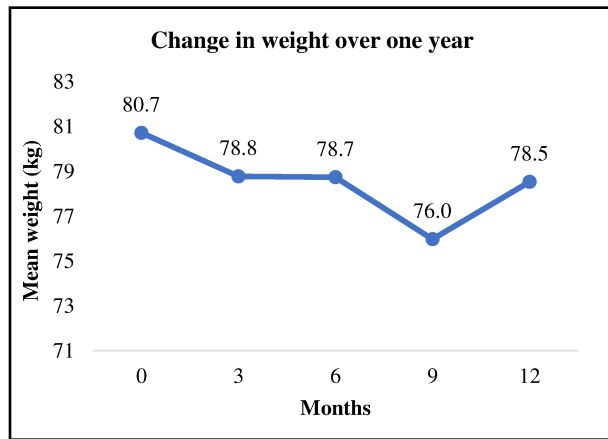

Supplemental Figure 2a: Weight change among study participants over one year

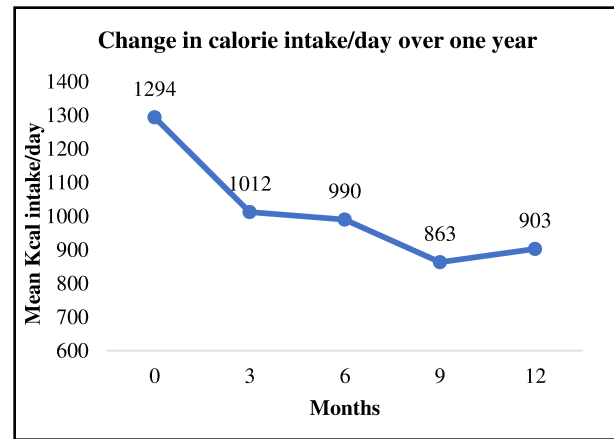

Supplemental Figure 2b: Kcal intake/day among study participants over one year

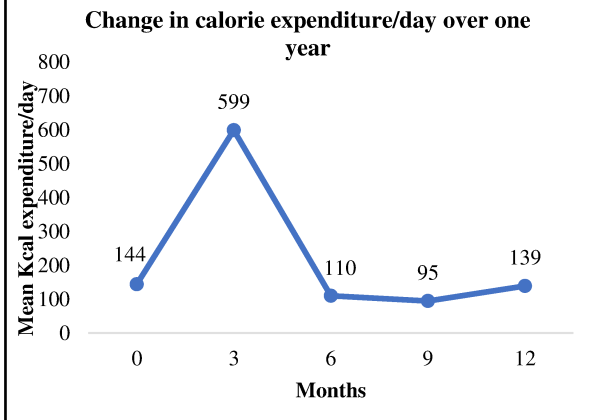

Supplemental Figure 2c: Kcal expenditure/day among study participants over one year

Supplemental Figure 2: Change in weight, calorie intake, and calorie expenditure among study participants over one year

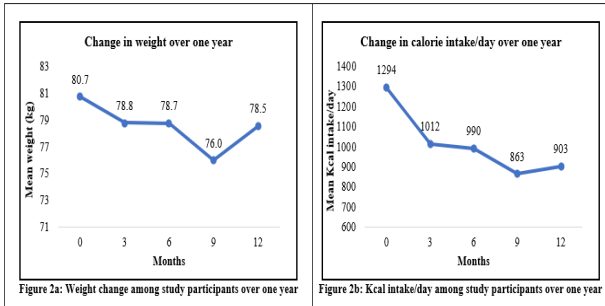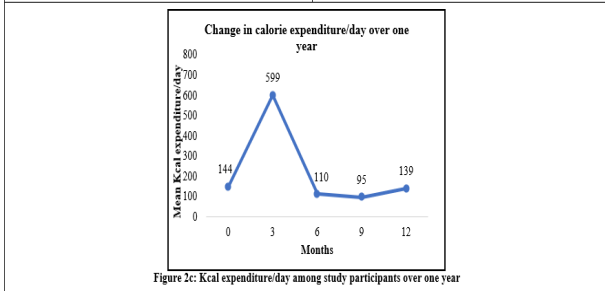

Supplement: bmjopen-2022-070913supp002_data_supplement.pdf [file bmjopen-2022-070913supp002_data_supplement.pdf]
