# Supplementary figures and images for: Feasibility of a peer-supported, WhatsApp-assisted, lifestyle modification intervention for weight reduction among adults in an urban slum of Karachi, Pakistan: a mixed-methods, single-group, pretest–post-test, quasi-experimental study
Source: HighWire-hosted journal article supplement (doi:10.1136/bmjopen-2022-070913), 2023-08-01

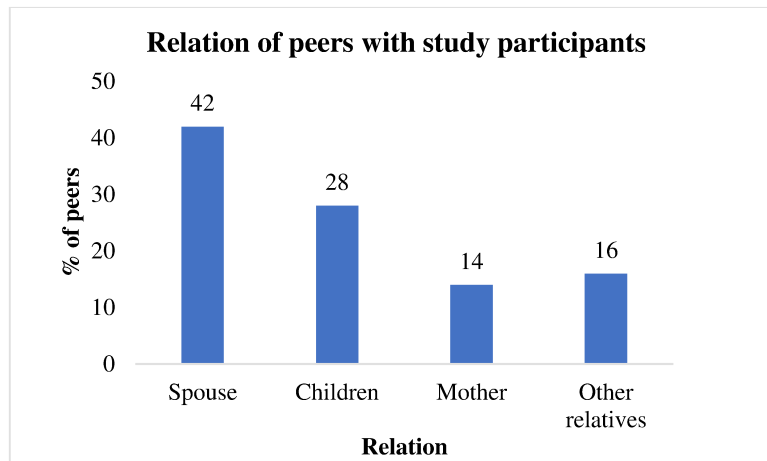

**Supplemental Figure 1: Relation of peers with study participants**

Supplement: bmjopen-2022-070913supp001_data_supplement.pdf [file bmjopen-2022-070913supp001_data_supplement.pdf]
